# Supplementary material for: Effects of Fertility on Gene Expression and Function of the Bovine Endometrium
Source: PLoS One. 2013 Aug 5;8(8):e69444. doi: 10.1371/journal.pone.0069444 (PMC3734181; doi:10.1371/journal.pone.0069444)
Supplement: Table S3 — qRT-PCR primers of candidate genes and housekeeping genes. (DOC) [file pone.0069444.s004.doc]

## Sheet: Sheet1
Gene	Primer	Sequence	Product Size (bp)	Accession No.
ASIP	Forward	CTCCTCCTGGCTACCTTGCT	80	NM_206843.2
	Reverse	TCTCTGGGCTTTTCCTCAGGT
GC	Forward	TTGCCCAGAAAGTGCCTACTGC	120	NM_001035380.1
	Reverse	CAGGAAGCTCCTTGATGCAGTCC
IGFBP1	Forward	ACAGCAAACAGTGTGAGA	70	NM_174554
	Reverse	CCACTCCAAGGGTAGACA
IFI47	Forward	ACACCTTTCTGCTGTGGCTT	102	BC102181
	Reverse	GGCAATCTGACTGACCGACT
LECT1	Forward	TGACCACAACGACCACAAGAAG	88	NM_174269.2
	Reverse	ACGCTGGGTCTGGTTCCG
MEP1B	Forward	CGGAAAGAGCCAAGTTCAAG	87	NM_001144098.1
	Reverse	TTGCTGGCTGTATTGCAGAG
NUDT4	Forward	AGCAGAACCAAGACGGAA	143	NM_001081618
	Reverse	GCACTGGAGAACTTTGAT
OXTR	Forward	CGTCGTGCTGGCCTTCATCGT	94	NM_174134.2
	Reverse	AGGTGAGGCTTCCTTGGGCG
PLAC8	Forward	GCGGAACAAGTGTCGCAATGAGG	102	NM_001076987.1
	Reverse	AGCACAGAGGACAGCAATGGGT
RNF14	Forward	GGTTCAGAGAAGGATGGCTCAAG	84	NM_001081540.1
	Reverse	TCCTCTTGGTCTATGTCAGATCCA
RUNDC1	Forward	CTTGGGGGAGGAGGTCTGA	81	NM_001205681.1
	Reverse	CCCGCTCTCCATCGCCA
SFRP4	Forward	GGCGCTCACGGATGATGCTT	120	NM_001075764.1
	Reverse	TGTCCTGGGCTGTCCTCTGCT
RPL19	Forward	CCCCAATGAGACCAATGAAATC	72	NM_001040516.1
	Reverse	CAGCCCATCTTTGATCAGCTT
